A236

**TITLE:** VENO-ARTERIAL GRADIENTS FOR  $PCO_2$  AND pH REFLECT TISSUE HYPOXIA DURING HEMORRHAGIC SHOCK IN DOGS

**AUTHORS:** Vanderlinden P, Gilbert E, Pâques P, Bakker J, Vincent JL

**AFFILIATION:** Dept of Anesthesiology and Intensive Care, Erasme University Hospital, Brussels, Belgium

When oxygen delivery ( $DO_2$ ) is reduced below a critical value ( $DO_{2crit}$ ), the tissues oxygen uptake ( $VO_2$ ) becomes  $DO_2$  dependent. This reduction in  $DO_2$  below  $DO_{2crit}$  is associated with the development of tissue hypoxia, as reflected by an increase in blood lactate levels (Lac). Increases in the veno-arterial gradients (VA) for  $PCO_2$  ( $VAPCO_2$ ) and pH ( $VApH$ ) can also be observed in low flow states. The present study tested the hypothesis that the  $DO_{2crit}$  obtained from repeated measurements of  $VO_2$ , Lac,  $VAPCO_2$  and  $VApH$  are in fact similar. We used an anesthetized dog model in which  $DO_2$  is reduced by progressive hemorrhage.

**MATERIAL & METHODS**

The study included 13 dogs (weight  $28.6 \pm 2.5$  kgs). Anesthesia was induced with thiopental ( $20 \text{ mg.kg}^{-1}$ ) and maintained with isoflurane (1 MAC = 1.4 % end-tidal). After endotracheal intubation, the dog was mechanically ventilated with air. After splenectomy,  $DO_2$  was reduced by successive withdrawal of 100 ml of blood every 15 min.  $VO_2$  was determined from the expired gas analysis and  $DO_2$  from the product of thermodilution cardiac output (CO) and the arterial  $O_2$  content. Measurements of CO, arterial and mixed venous blood gases, Lac and expired gas concentrations were performed before every blood withdrawal.

In each dog, the  $DO_{2crit}$  was determined from a dual regression analysis using the least sum of squares technique.

**RESULTS**

The  $DO_{2crit}$  obtained from  $VO_2$ , Lac,  $VAPCO_2$  and  $VApH$  were  $9.2 \pm 1.4$ ,  $8.8 \pm 1.1$ ,  $9.0 \pm 1.2$ , and  $8.9 \pm 1.1 \text{ ml.kg}^{-1}.\text{min}^{-1}$ , respectively. The  $DO_{2crit}$  obtained from  $VO_2$  correlated well with those obtained from Lac ( $r = .89$ ),  $VAPCO_2$  ( $r = .81$ ) and  $VApH$  ( $r = .75$ ). The  $VO_2$ , Lac,  $VAPCO_2$  and  $VApH$  at  $DO_{2crit}$  were  $5.4 \pm 0.9 \text{ ml.min}^{-1}.\text{kg}^{-1}$ ,  $3.1 \pm 1.3 \text{ mEq/l}$ ,  $-10.9 \pm 3.5 \text{ mmHg}$  and  $0.05 \pm 0.02 \text{ U}$ , respectively.

**CONCLUSIONS**

In this hemorrhagic shock model, the onset of tissue hypoxia associated with the profound reduction in  $DO_2$  is reflected by abrupt increases not only in Lac, but also in  $VAPCO_2$  and  $VApH$ . Accordingly, these parameters, easily obtained from arterial and mixed venous blood gas sampling, could represent valuable indicators of cellular hypoxia.

A237

**TITLE:** VENTILATION-PERFUSION INDEX CAN ACCURATELY REFLECT VENOUS ADMIXTURE IN CRITICALLY ILL PATIENTS

**AUTHORS:** G.B. RUSSELL, M.D., J.M. GRAYBEAL, CRTT, M.T. SNIDER, M.D., PH.D.

**AFFILIATION:** Division of Respiratory & Intensive Care, Department of Anesthesia, Penn State University College of Medicine, Hershey, PA 17033

**INTRODUCTION:** The clinical course of the hypoxemic state associated with the Adult Respiratory Distress Syndrome (ARDS) can be monitored with serial measurements of venous admixture ( $Qs/Qt$ ). The determination of  $Qs/Qt$  uses simultaneous arterial and mixed venous blood gas measurements and is calculated with the equation,  $Qs/Qt = (CcO_2 - CaO_2 / CcO_2 - CvO_2)$ , utilizing oxygen contents of pulmonary capillary, systemic arterial, and mixed venous blood, respectively. The ventilation-perfusion index ( $VQI = 100 - SaO_2 / 100 - SvO_2$ ), utilizing oxygen saturations of arterial and mixed venous blood, respectively, has been advocated as a simplified, immediate and less expensive method of monitoring  $Qs/Qt$ . Previous clinical comparisons of VQI and  $Qs/Qt$  have been made when  $Qs/Qt$  has been  $\leq 45\%$ . We hypothesized that VQI would also reliably assess  $Qs/Qt$  particularly in the range between 45 - 100% as seen in patients critically ill with ARDS.

**METHODS:** With approval of the institutional Clinical Investigations Committee, 12 adult patients (5 male, aged  $25 \pm 7$  yrs.) were studied and 370 comparisons of calculated  $Qs/Qt$  and VQI values made. All patients had severe ARDS; 11 required either extracorporeal membrane oxygenation or experimental use of intravenous oxygenation for respiratory support. Blood gases were sampled as clinically indicated and measurements made utilizing both an IL - 1323 Blood Gas Analyzer and an IL - 282 Hemoximeter.  $Qs/Qt$  was calculated by the clinical laboratory computer using the classic equation. Comparisons were made over a wide range of  $Qs/Qt$  (8 to 100%),  $FiO_2$  (0.21 - 1.0), PEEP (5 - 30 cm H<sub>2</sub>O),  $SaO_2$  (65 - 99%),  $SvO_2$  (35 - 92%), hemoglobin (6.6 - 14.9 gm%), and  $PaCO_2$  (23 - 74 mmHg). VQI and  $Qs/Qt$  correlation was determined by linear regression. A p value  $< 0.05$  was considered significant. Bias and standard deviation of the differences (SDD) were also calculated.

**RESULTS:** The frequency distribution of calculated  $Qs/Qt$  was:  $<15\%$  (18), 15-30% (81), 30-45% (103), 45-60% (44), 60-75% (33), and  $>75\%$  (91).  $Qs/Qt$  was above 60% in 124 of 370 comparisons. There was a strong correlation ( $r = 0.973$ ,  $p < 0.001$ , slope = 1.072, y intercept = -8.4) over the range of VQI and  $Qs/Qt$  values measured. Overall, calculated bias was  $4.7 (\pm 7.6 \text{ SDD})\%$ . Maximum bias was  $8.7 (\pm 7.0)\%$  for comparisons in the 30 - 45%  $Qs/Qt$  range (figure). Changes in VQI correctly predicted changes in  $Qs/Qt$  in 88% of measurements. The incorrectly predicted changes were evenly distributed; 21 false predictions of deterioration and 22 false predictions of improvement.

**CONCLUSIONS:** In patients with severe ARDS, there was a high correlation between VQI and  $Qs/Qt$  over a wide range of  $Qs/Qt$  values. Maximal bias was found in the clinically significant 30-45%  $Qs/Qt$  range. The direction of  $Qs/Qt$  changes was correctly predicted in 88% of comparisons. VQI can provide rapid, relatively inexpensive and, if the correlation extends to saturation measurements utilizing pulse oximetry and fiberoptic  $SvO_2$  monitoring, continuous assessment over a wide  $Qs/Qt$  range. Clinical use of VQI should be made with the understanding that variations in correlation and predictability of  $Qs/Qt$  changes do occur.

**FIGURE** The agreement between VQI and  $Qs/Qt$  is demonstrated across the range of  $Qs/Qt$  measured in patients critically ill with ARDS.

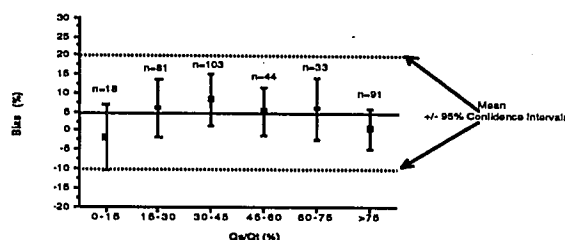

Source: https://asa2.silverchair.com/anesthesiology/article-pdf/75/3/A237/640357/0000542-199109001-00237.pdf
